# Supplementary material for: Inflammation and stem markers association to PIM1/PIM2 kinase-induced tumors in breast and uterus
Source: PubMed Central journal article supplement (PMC5601700; doi:10.18632/oncotarget.19438), 2017-07-22
Supplement: oncotarget-08-58872-s001.pdf [file oncotarget-08-58872-s001.pdf]

# Inflammation and stem markers association to PIM1/PIM2 kinase-induced tumors in breast and uterus

## SUPPLEMENTARY MATERIALS

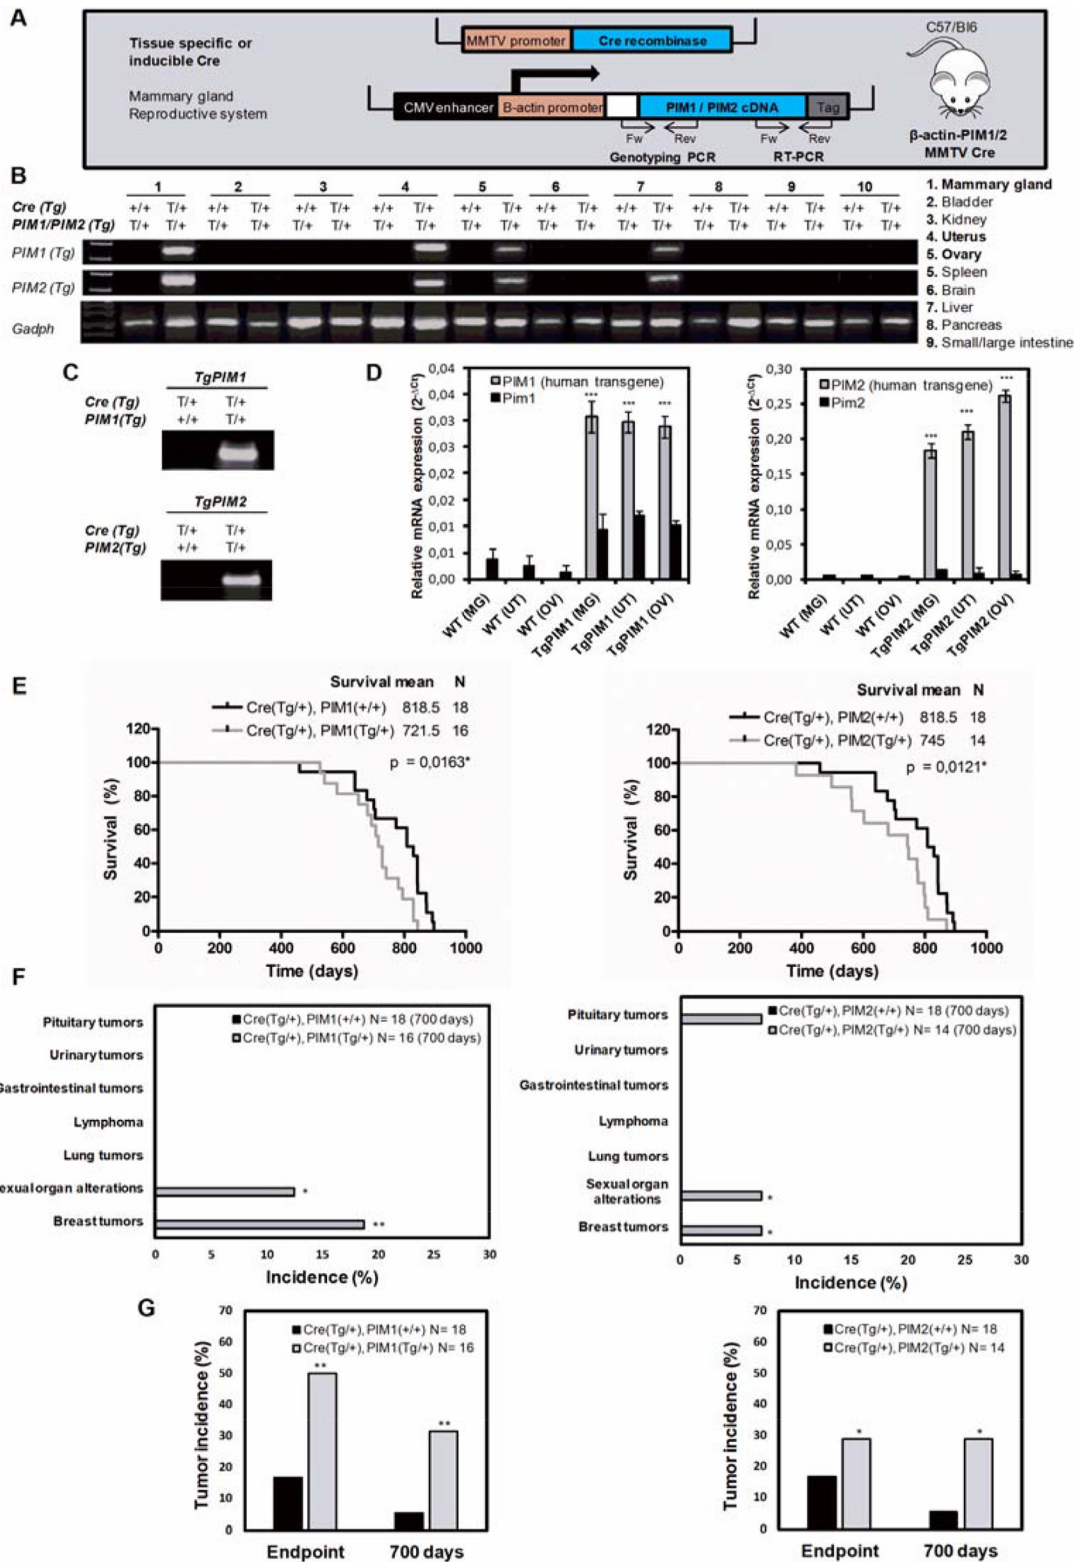

**Supplementary Figure 1: Generation and validation of transgenic MMTV-Cre/PIM1 and MMTV-Cre/PIM2 conditional murine models.** (A) Animals carrying respective PIM1/PIM2 transgenes silenced by a stop sequence flanked by LoxP sites were crossed with mice expressing Cre-recombinase regulated by the MMTV promoter. The result is two mouse lines that express either PIM1 or PIM2 human transgenes specifically in hormone-dependent tissues, where Cre expression excised the Lox/Stop/Lox cassette and allowed transgene expression. (B) Reverse transcriptase PCR was performed to validate tissue-specific relative expression levels of either PIM1 or PIM2 in TgPIM1/TgPIM2 models, indicating specific transgene expression in the mammary gland, female reproductive organs (uterus and ovary) and brain tissues. (C) DNA obtained from the digested tails of the mice was used to genotype the TgPIM1 or TgPIM2 models by PCR. (D) Levels of PIM1/PIM2 transgene relative to Pim1/Pim2 endogenous mRNAs were measured in mammary glands (MG), uterus (UT) and ovary (OV) of both TgPIM1/TgPIM2 and WT mice by qRT-PCR. (E) TgPIM1, TgPIM2 and WT model mouse survival as indicated by Kaplan-Meier curves. Both models exhibit a statistically significant reduction of survival rate compared with WT mice. (F) Tumor incidence in both female models at day 700. Data show the observed macroscopic pathologies in TgPIM1 and TgPIM2 mice compared with WT background, indicating a statistically significant tumor incidence increase in sexual organ alterations in both models. (G) Total tumor incidence in both models at day 700 and the clinical endpoint. This graph shows total percentage of tumors observed from a macroscopic view per model compared with WT, indicating a statistically significant increase in the percentage of total tumor types in the TgPIM1/TgPIM2 models. The *p*-value was obtained using a one-tailed Student's *t*-test in (A, B, C, D, F and G). The *p*-value was obtained using a Mantel-Cox test (also called Log rank Chi2-based test) in (E), (\**p* < 0,05), (\*\**p* < 0,01) and (\*\*\*)*p* < 0,001).

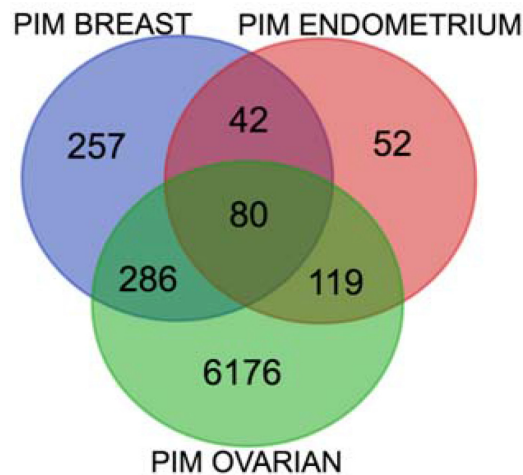

**Supplementary Figure 2: Venn-diagram of genes that correlate with PIM1 and PIM2 in Breast, endometrial and ovarian tumors, and genes common to combination of tumor types.**

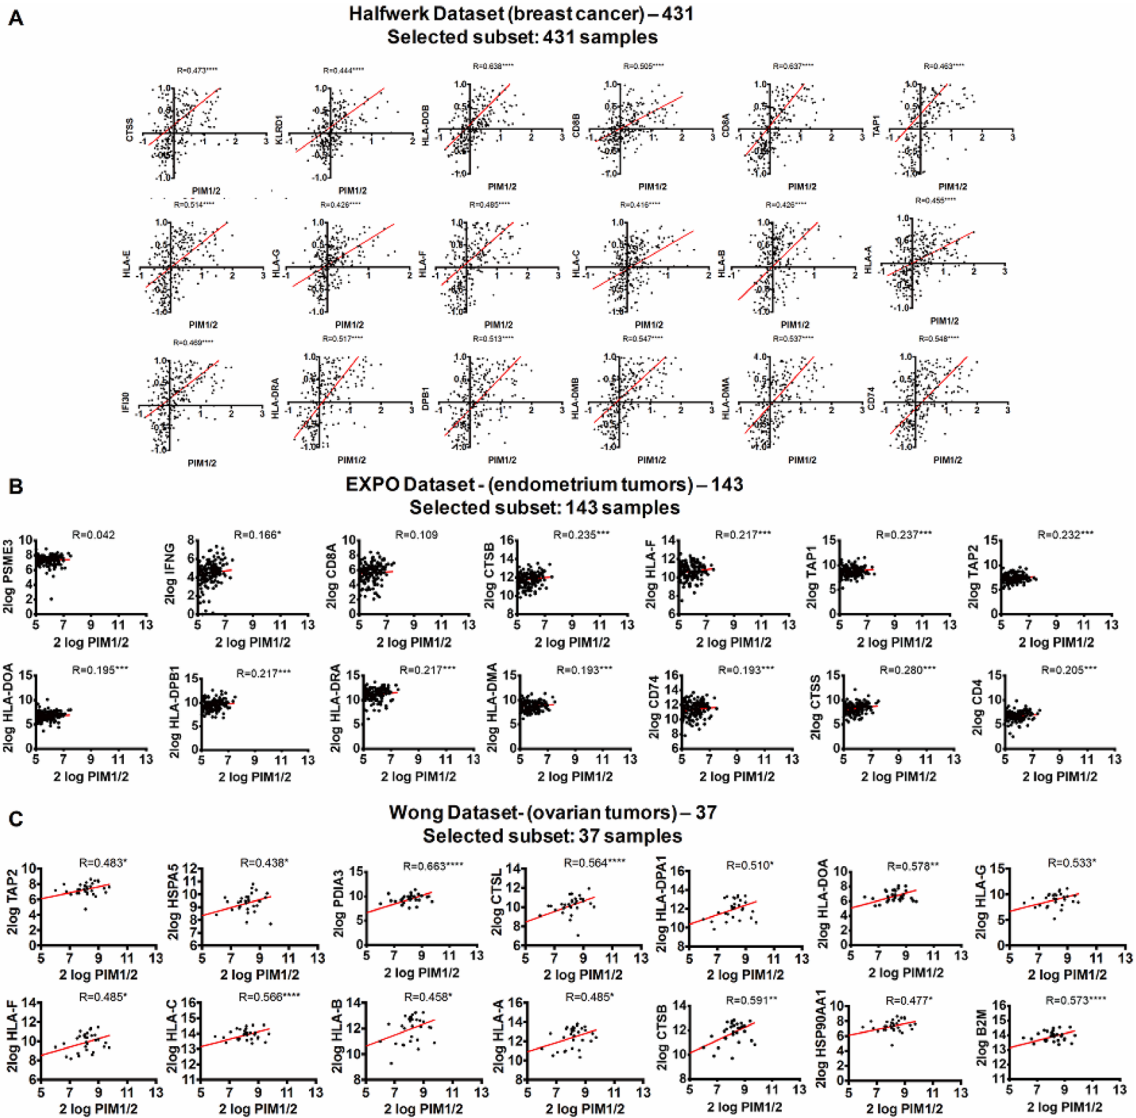

Supplementary Figure 3: One to one Pearson's correlation of the list of immune system-dependent genes signature depicted in the heatmaps displayed in Figure 5 of human breast, endometrium and ovary tumors databases analysed.

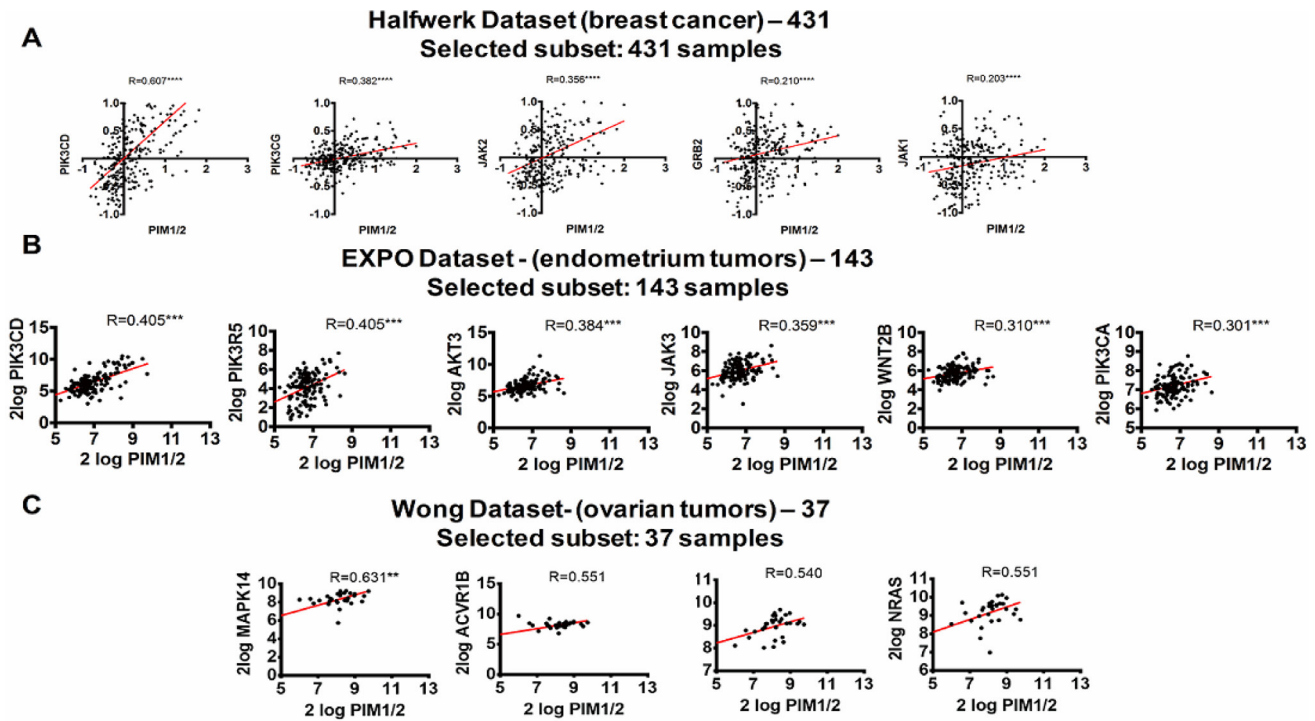

Supplementary Figure 4: One to one Pearson’s correlation of the list of stem-dependent genes signature described in the heatmaps displayed in figure 6 of human breast, endometrium and ovary tumors databases analysed.

Supplementary Table 1: Common genes correlating with PIM1 and PIM2 expression in breast, ovarian and endometrium tumors. See Supplementary\_Table\_1

**Supplementary Table 2: GO enrichment for process of genes correlating with PIM1 and PIM2 expression in all three breast, ovarian and endometrium tumors**

| <b>GoId</b> | <b>Term</b>                                     | <b>Corrected <i>P</i> value</b> |
|-------------|-------------------------------------------------|---------------------------------|
| GO:0009617  | response to bacterium                           | 3,43E+07                        |
| GO:0002376  | immune system process                           | 7,67E+07                        |
| GO:0043207  | response to external biotic stimulus            | 2,71E+08                        |
| GO:0051707  | response to other organism                      | 2,71E+08                        |
| GO:0009607  | response to biotic stimulus                     | 4,28E+08                        |
| GO:0032496  | response to lipopolysaccharide                  | 4,33E+07                        |
| GO:0006952  | defense response                                | 4,68E+08                        |
| GO:0006955  | immune response                                 | 5,91E+07                        |
| GO:0002237  | response to molecule of bacterial origin        | 6,40E+06                        |
| GO:0034097  | response to cytokine                            | 3,32E+09                        |
| GO:0048583  | regulation of response to stimulus              | 5,15E+09                        |
| GO:0009605  | response to external stimulus                   | 0.000132246974172086            |
| GO:0007165  | signal transduction                             | 0.000185186238256669            |
| GO:0051716  | cellular response to stimulus                   | 0.000192915225072843            |
| GO:0007166  | cell surface receptor signaling pathway         | 0.000194146704417251            |
| GO:0071345  | cellular response to cytokine stimulus          | 0.000200820221676121            |
| GO:0050896  | response to stimulus                            | 0.000219101934006273            |
| GO:0033622  | integrin activation                             | 0.000229550239127017            |
| GO:0045087  | innate immune response                          | 0.000371687962152313            |
| GO:0002682  | regulation of immune system process             | 0.000400231755999877            |
| GO:0044700  | single organism signaling                       | 0.000571677399544299            |
| GO:0048584  | positive regulation of response to stimulus     | 0.000606581231880176            |
| GO:0023052  | signaling                                       | 0.000607020301368781            |
| GO:0007154  | cell communication                              | 0.000615016495071497            |
| GO:0002684  | positive regulation of immune system process    | 0.00153489328532374             |
| GO:1901700  | response to oxygen-containing compound          | 0.00195704193579501             |
| GO:0051704  | multi-organism process                          | 0.00253810803158615             |
| GO:0048518  | positive regulation of biological process       | 0.00267249757157674             |
| GO:0010033  | response to organic substance                   | 0.00367383310482357             |
| GO:0006950  | response to stress                              | 0.00398041612316704             |
| GO:1901701  | cellular response to oxygen-containing compound | 0.00657112985458861             |
| GO:0033993  | response to lipid                               | 0.00711211266110781             |
| GO:0050900  | leukocyte migration                             | 0.00832471826976121             |
| GO:0050789  | regulation of biological process                | 0.0090034003189567              |
| GO:0080134  | regulation of response to stress                | 0.00925245974559772             |

**Supplementary Table 3: Proteins of antigen processing and presentation (KEGG) (HLA and inflammation) correlating with PIM1 or PIM2 levels in breast cancer**

| <i>Halfwerk dataset</i> |                |                |
|-------------------------|----------------|----------------|
|                         | <i>r-value</i> | <i>P-Value</i> |
| HLA-DOB                 | 0.638          | < 0.01         |
| CD8A                    | 0.637          | < 0.01         |
| CD74                    | 0.548          | < 0.01         |
| HLA-DMB                 | 0.547          | < 0.01         |
| HLA-DMA                 | 0.537          | < 0.01         |
| HLA-DPA1                | 0.517          | < 0.01         |
| HLA-DRA                 | 0.517          | < 0.01         |
| HLA-E                   | 0.514          | < 0.01         |
| DPB1                    | 0.513          | < 0.01         |
| CD8B                    | 0.505          | < 0.01         |
| HLA-F                   | 0.485          | < 0.01         |
| CTSS                    | 0.473          | < 0.01         |
| IFI30                   | 0.469          | < 0.01         |
| TAP1                    | 0.463          | < 0.01         |
| HLA-A                   | 0.455          | < 0.01         |
| KLRD1                   | 0.444          | < 0.01         |
| HLA-G                   | 0.435          | < 0.01         |
| HLA-B                   | 0.426          | < 0.01         |
| HLA-C                   | 0.416          | < 0.01         |

**Supplementary Table 4: Proteins of antigen processing and presentation (KEGG) (HLA and inflammation) correlating with PIM1 or PIM2 levels in endometrial cancer**

| <i>GSE2109</i> |                |                |
|----------------|----------------|----------------|
|                | <i>r-value</i> | <i>P-Value</i> |
| CD4            | 0.205          | < 0.01         |
| CTSS           | 0.280          | < 0.01         |
| CD74           | 0.193          | < 0.01         |
| HLA-DMA        | 0.193          | < 0.01         |
| HLA-DRA        | 0.217          | < 0.01         |
| HLA-DPB1       | 0.217          | < 0.01         |
| HLA-DOA        | 0.195          | < 0.01         |
| TAP2           | 0.232          | < 0.01         |
| TAP1           | 0.237          | < 0.01         |
| HLA-F          | 0.217          | < 0.01         |
| CTSB           | 0.235          | < 0.01         |
| CD8A           | 0.109          | 0.09           |
| IFNG           | 0.166          | 0.02           |
| PSME3          | 0.042          | 0.55           |

**Supplementary Table 5: Proteins of antigen processing and presentation (KEGG) (HLA and inflammation) correlating with PIM1 or PIM2 levels in ovarian cancer**

| <i>GSE40595</i> |                |                |
|-----------------|----------------|----------------|
|                 | <i>r-value</i> | <i>P-Value</i> |
| PDIA2           | 0.664          | < 0.01         |
| CTSB            | 0.591          | 0.01           |
| HLA-DOA         | 0.578          | 0.01           |
| B2M             | 0.573          | < 0.01         |
| HLA-C           | 0.566          | < 0.01         |
| CTSL            | 0.564          | < 0.01         |
| HLA-G           | 0.533          | 0.02           |
| HLA-DPA1        | 0.510          | 0.02           |
| HLA-F           | 0.485          | 0.03           |
| HLA-A           | 0.485          | 0.03           |
| TAP2            | 0.483          | 0.03           |
| HSP90AA1        | 0.477          | 0.03           |
| HLA-B           | 0.458          | 0.04           |
| HSPA5           | 0.438          | 0.05           |

**Supplementary Table 6: Proteins of proteins of pathways controlling stemness and pluripotency (KEGG) correlating with PIM1 or PIM2 levels in breast cancer**

| <i>Halfwerk dataset</i> |                |                |
|-------------------------|----------------|----------------|
|                         | <i>r-value</i> | <i>P-Value</i> |
| PIK3CD                  | 0.607          | < 0.01         |
| PIK3CG                  | 0.382          | < 0.01         |
| JAK2                    | 0.356          | < 0.01         |
| GRB2                    | 0.210          | < 0.01         |
| JAK1                    | 0.203          | < 0.01         |

**Supplementary Table 7: Proteins of pathways controlling stemness and pluripotency (KEGG) endometrial cancer**

| <i>GSE2109</i> |                |                |
|----------------|----------------|----------------|
|                | <i>r-value</i> | <i>P-Value</i> |
| PIK3CD         | 0.405          | < 0.01         |
| PIK3R5         | 0.405          | < 0.01         |
| AKT3           | 0.384          | < 0.01         |
| JAK3           | 0.359          | < 0.01         |
| WNT2B          | 0.310          | < 0.01         |
| PIK3CA         | 0.301          | < 0.01         |

**Supplementary Table 8: Proteins of Pathways controlling stemness and pluripotency (KEGG) correlating with PIM1 or PIM2 levels in Ovarian Cancer**

| <i>GSE40595</i> |                |                |
|-----------------|----------------|----------------|
|                 | <i>r-value</i> | <i>P-Value</i> |
| MAPK14          | 0.631          | 0.02           |
| ACVR1B          | 0.553          | 0.07           |
| GRB2            | 0.540          | 0.06           |
| NRAS            | 0.506          | 0.08           |
